# Supplementary material for: The precise molecular location of gadolinium atoms has a significant influence on the efficacy of nanoparticulate MRI positive contrast agents
Source: Royal Society of Chemistry journal article supplement (doi:10.1039/c3py01676e), 2013-12-18
Supplement: c3py01676e.pdf [file c3py01676e.pdf]

## Electronic Supporting Information

### The Precise Molecular Location of Gadolinium Atoms has a Significant Influence on the Efficacy of Nanoparticulate MRI Positive Contrast Agents

Yang Li<sup>1</sup>, Sophie Laurent<sup>2</sup>, Lars Esser<sup>4</sup>, Luce Vander Elst<sup>2</sup>, Robert N. Muller<sup>2</sup>, Andrew B. Lowe<sup>3\*</sup>, Cyrille Boyer<sup>1,3\*</sup> and Thomas P. Davis<sup>4,5\*</sup>

<sup>1</sup>*Australian Centre for Nanomedicine (ACN), School of Chemical Engineering, The University of New South Wales, Sydney, NSW 2052, Australia*

<sup>2</sup>*NMR and Molecular Imaging Laboratory, Department of General, Organic and Biomedical Chemistry, University of Mons, 7000 Mons, Belgium*

<sup>3</sup>*Centre for Advanced Macromolecular Design, School of Chemical Engineering, University of New South Wales, Kensington, Sydney, NSW 2052, Australia*

<sup>4</sup>*Monash Institute of Pharmaceutical Sciences, Monash University, Parkville, VIC 3052, Australia*

<sup>5</sup>*Department of Chemistry, University of Warwick, Coventry, UK, CV4 7AL*

### Part 1: Polymer characterizations

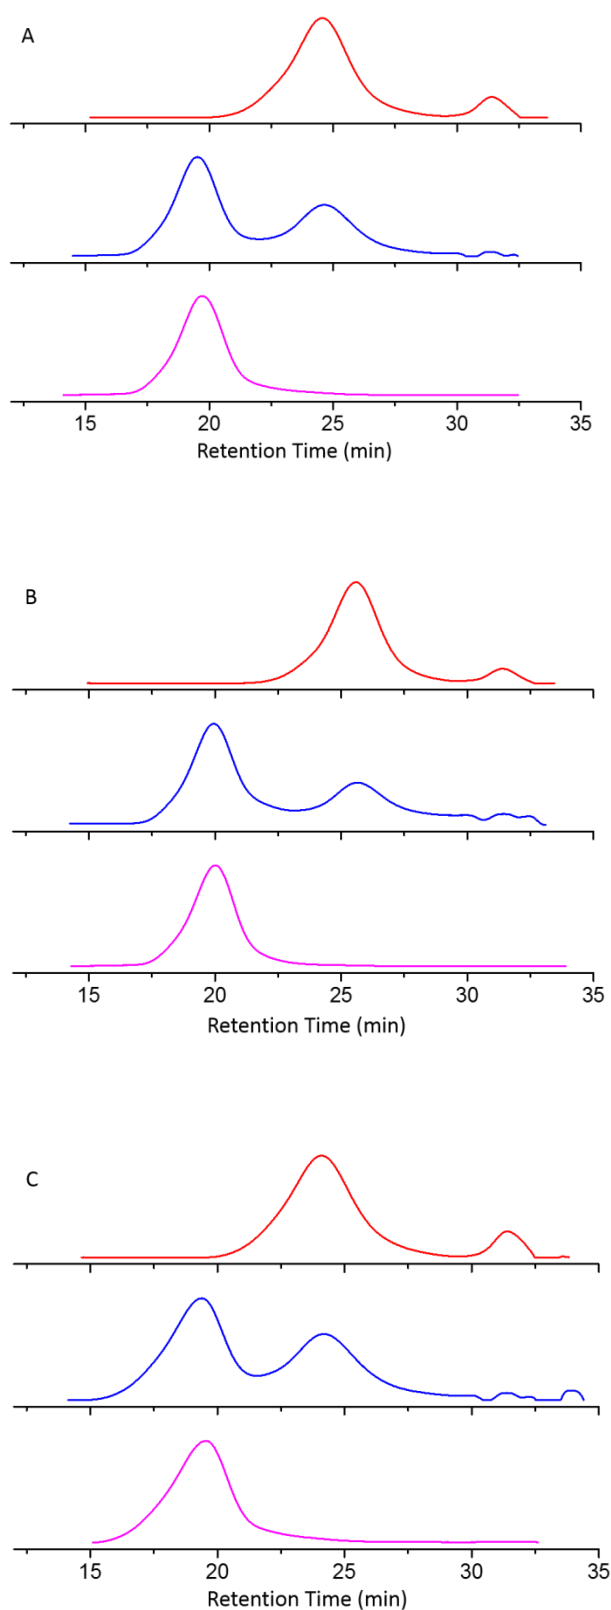

**Figure S1.** SEC traces (—star arm linear polymer; —crude star polymer; —star polymer after purification) of different star polymers used in this study. A) CCS-A; B) CCS-B and C) CCS-C.

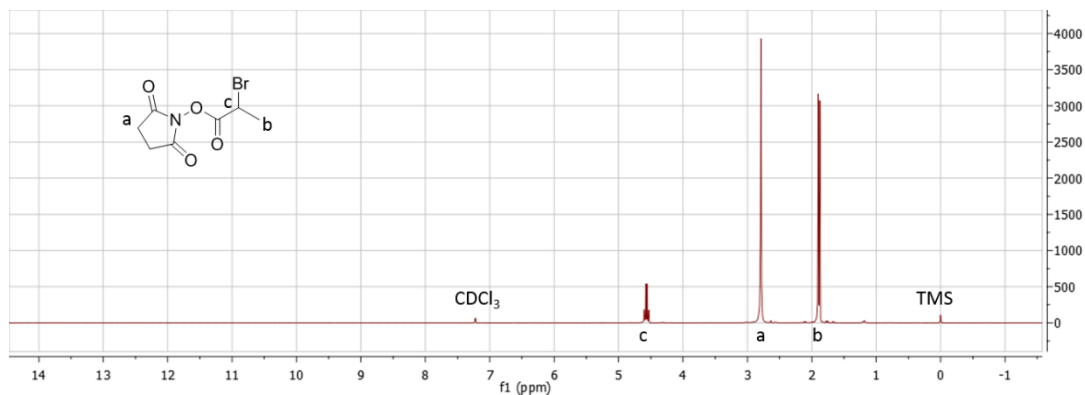

**Figure S2.**  $^1\text{H}$  NMR spectrum of N-succinimidyl bromoacetate recorded in  $\text{CDCl}_3$

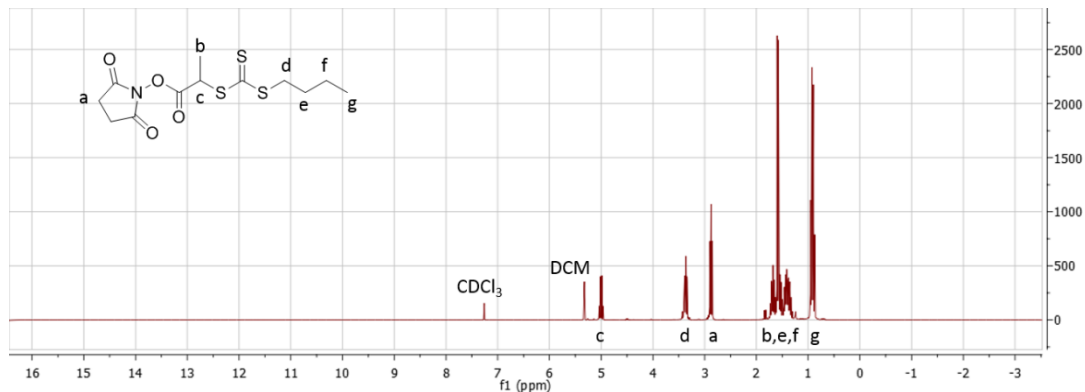

**Figure S3.**  $^1\text{H}$  NMR spectrum of 2,5-dioxopyrrolidin-1-yl 2-(((butylthio) carbonothioyl) thio) propanoate (DPBP) recorded in  $\text{CDCl}_3$

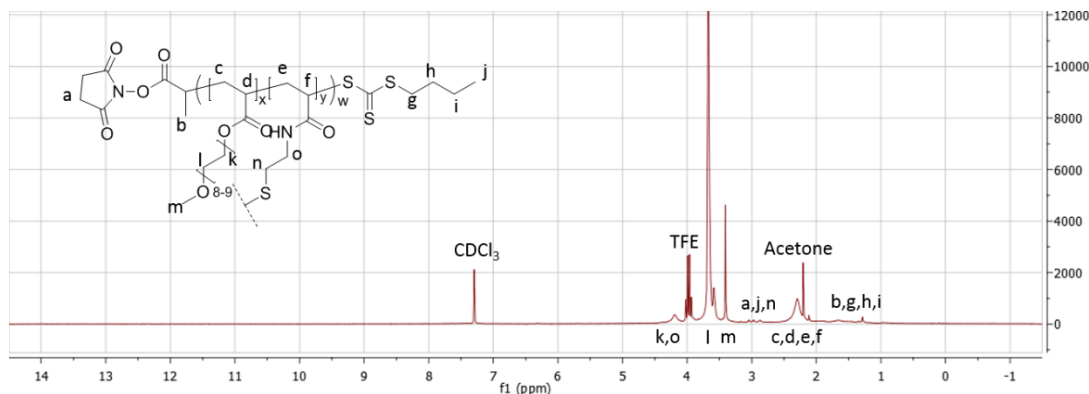

**Figure S4.**  $^1\text{H}$  NMR spectrum of CCS-A recorded in  $\text{CDCl}_3$

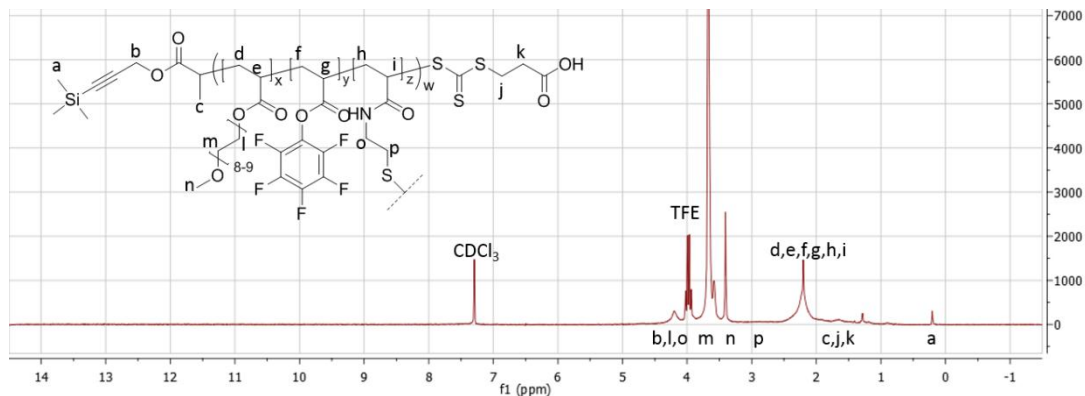

**Figure S5.**  $^1\text{H}$  NMR spectrum of CCS-B recorded in  $\text{CDCl}_3$

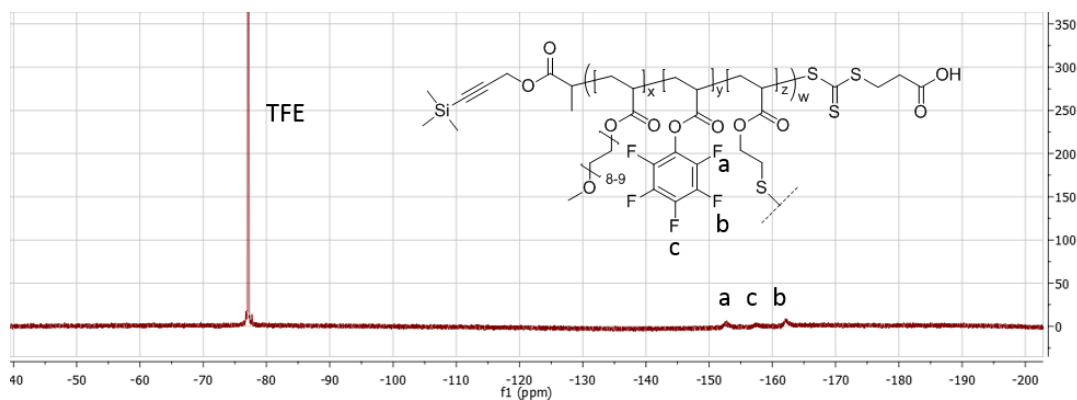

**Figure S6.**  $^{19}\text{F}$  NMR spectrum of CCS-B recorded in  $\text{CDCl}_3$

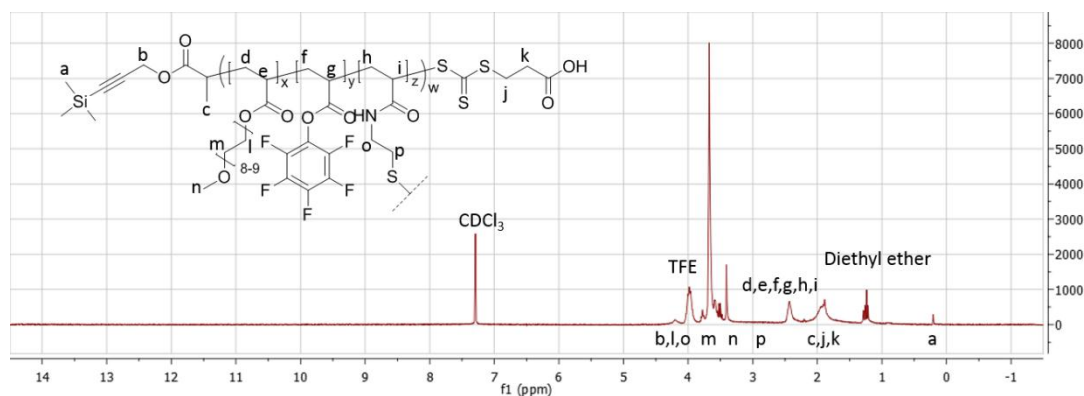

**Figure S7.**  $^1\text{H}$  NMR spectrum of CCS-C recorded in  $\text{CDCl}_3$

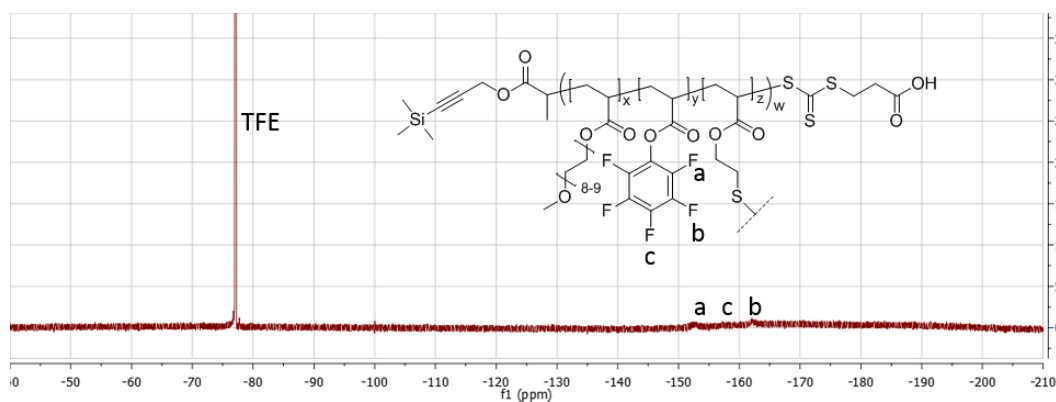

**Figure S8.**  $^{19}\text{F}$  NMR spectrum of CCS-C recorded in  $\text{CDCl}_3$

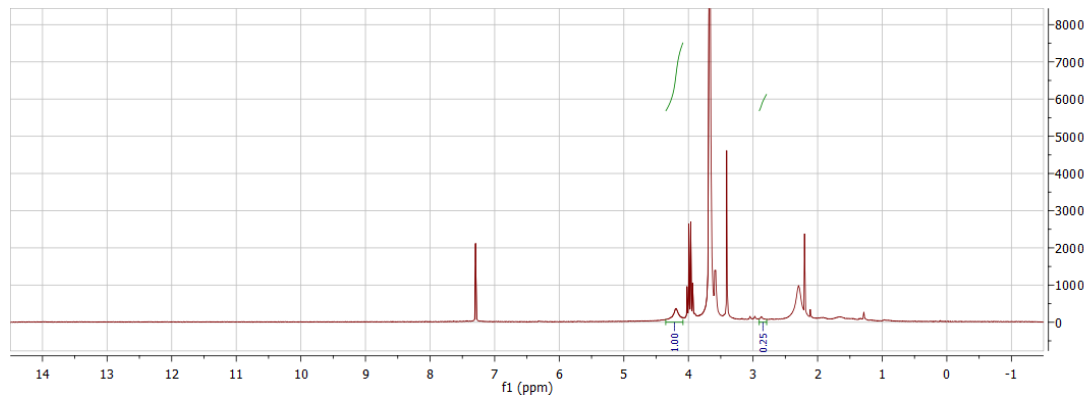

**Figure S9.**  $^1\text{H}$  NMR spectrum of CCS-A recorded in  $\text{CDCl}_3$

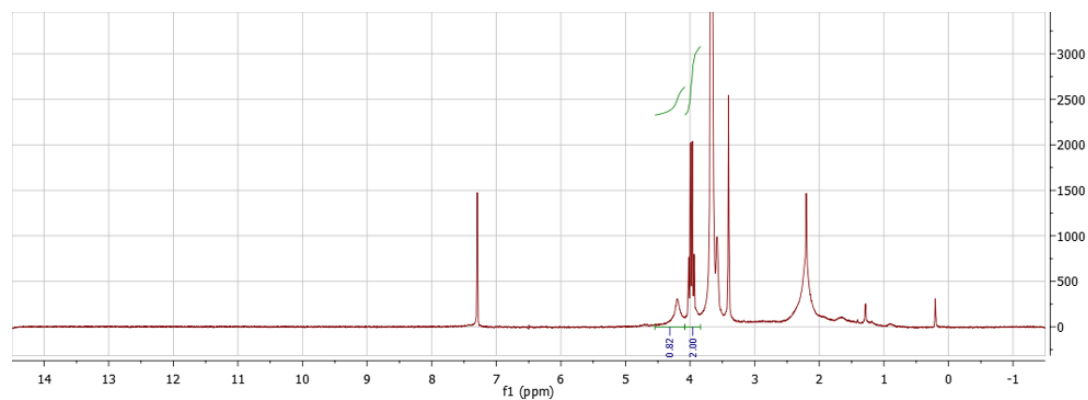

**Figure S10.**  $^1\text{H}$  NMR spectrum of CCS-B recorded in  $\text{CDCl}_3$

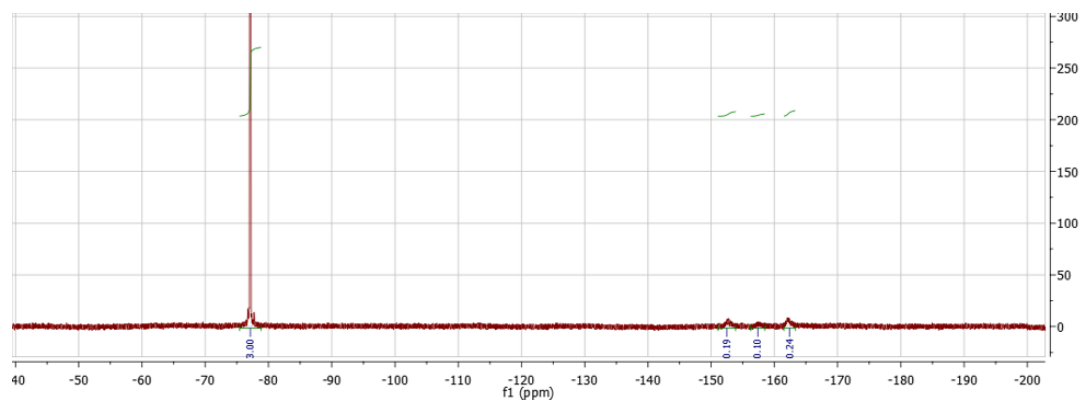

**Figure S11.**  $^{19}\text{F}$  NMR spectrum of CCS-B recorded in  $\text{CDCl}_3$

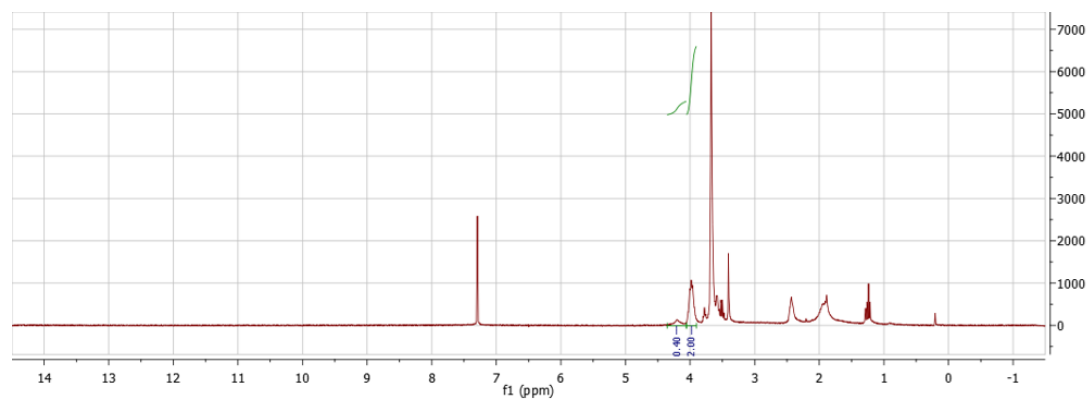

**Figure S12.**  $^1\text{H}$  NMR spectrum of CCS-C recorded in  $\text{CDCl}_3$

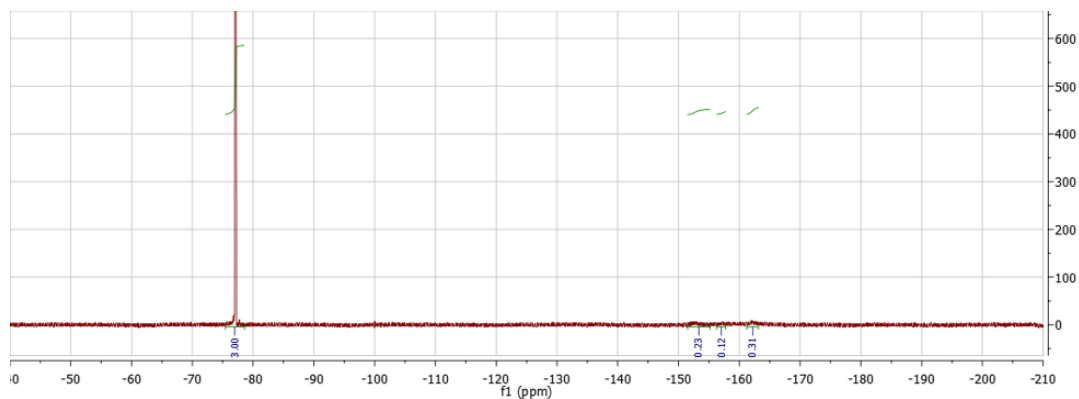

**Figure S13.**  $^{19}\text{F}$  NMR spectrum of CCS-C recorded in  $\text{CDCl}_3$

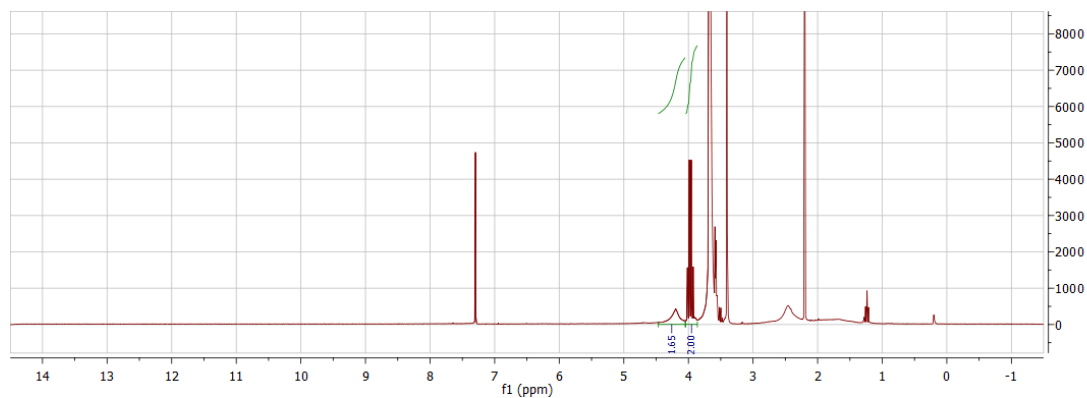

**Figure S14.**  $^1\text{H}$  NMR spectrum of HBP-D recorded in  $\text{CDCl}_3$

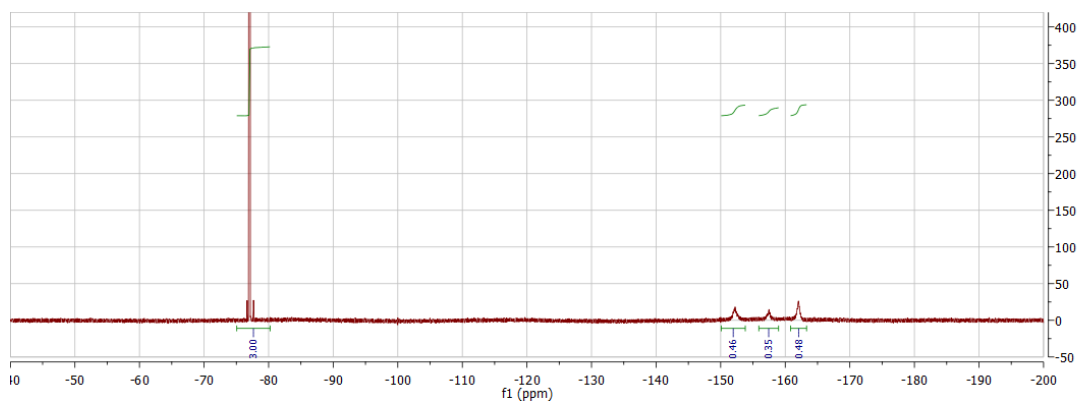

**Figure S15.**  $^{19}\text{F}$  NMR spectrum of HBP-D recorded in  $\text{CDCl}_3$

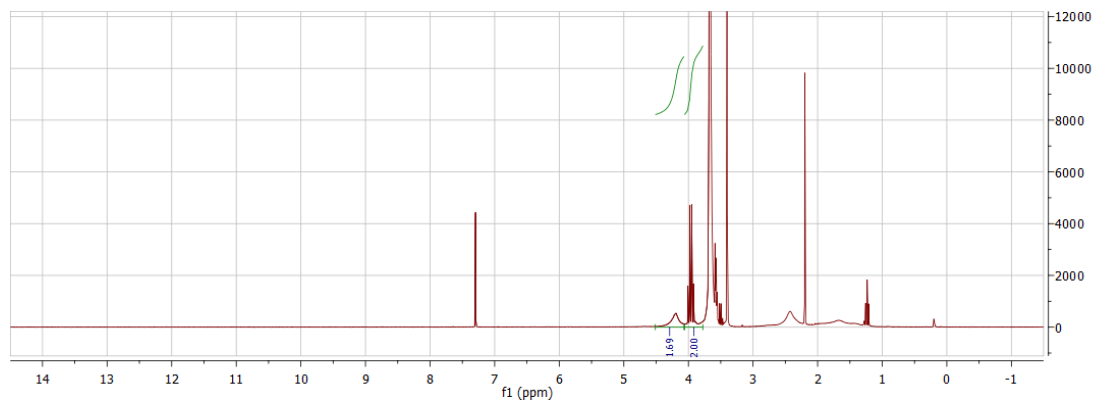

**Figure S16.**  $^1\text{H}$  NMR spectrum of HBP-E recorded in  $\text{CDCl}_3$

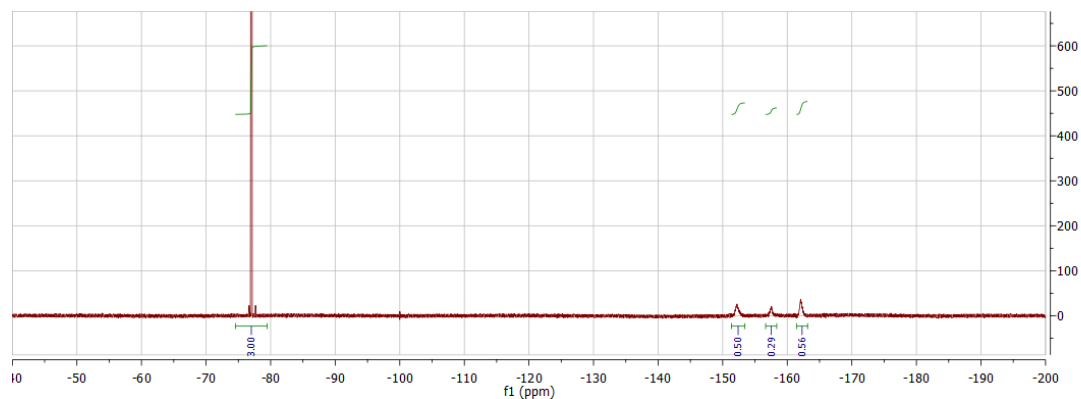

**Figure S17.**  $^{19}\text{F}$  NMR spectrum of HBP-E recorded in  $\text{CDCl}_3$

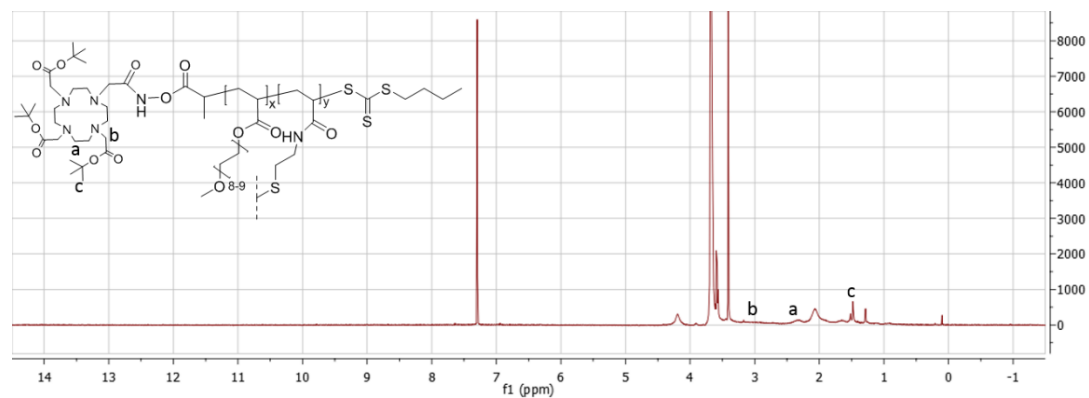

**Figure S18.**  $^1\text{H}$  NMR spectrum of CCS-A-DO3A recorded in  $\text{CDCl}_3$

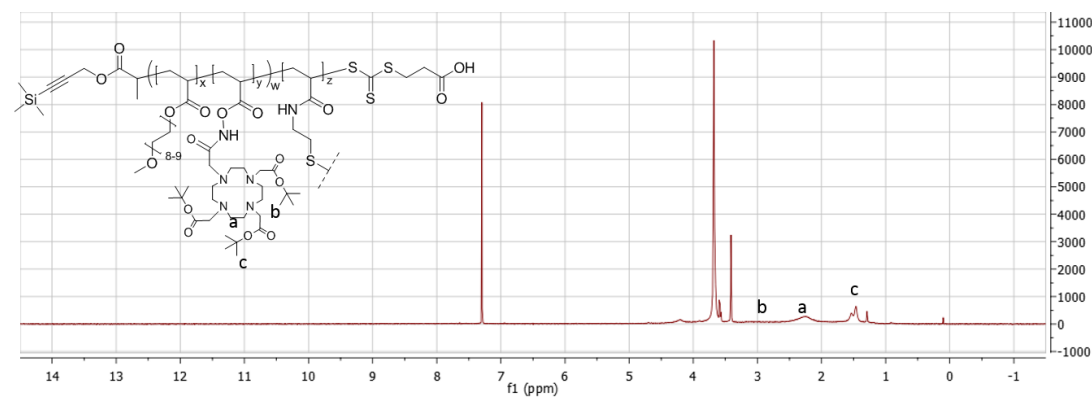

**Figure S19.**  $^1\text{H}$  NMR spectrum of CCS-B-DO3A recorded in  $\text{CDCl}_3$

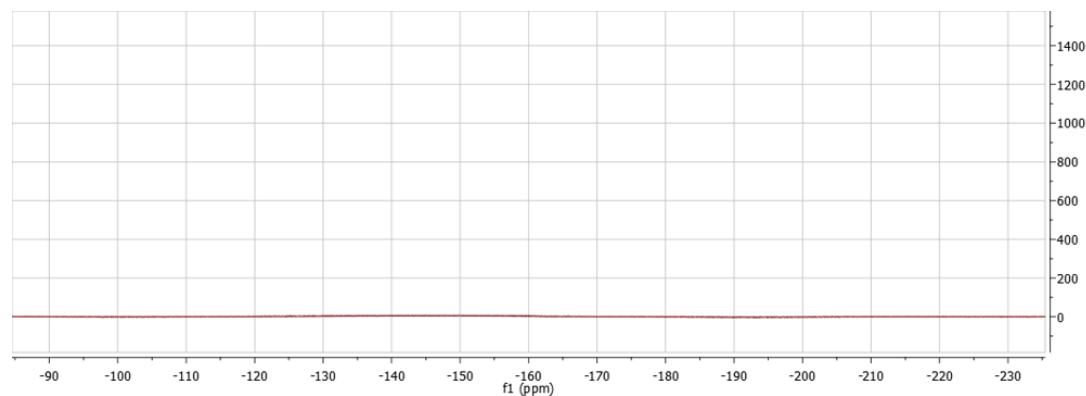

**Figure S20.**  $^{19}\text{F}$  NMR spectrum of CCS-B-DO3A recorded in  $\text{CDCl}_3$

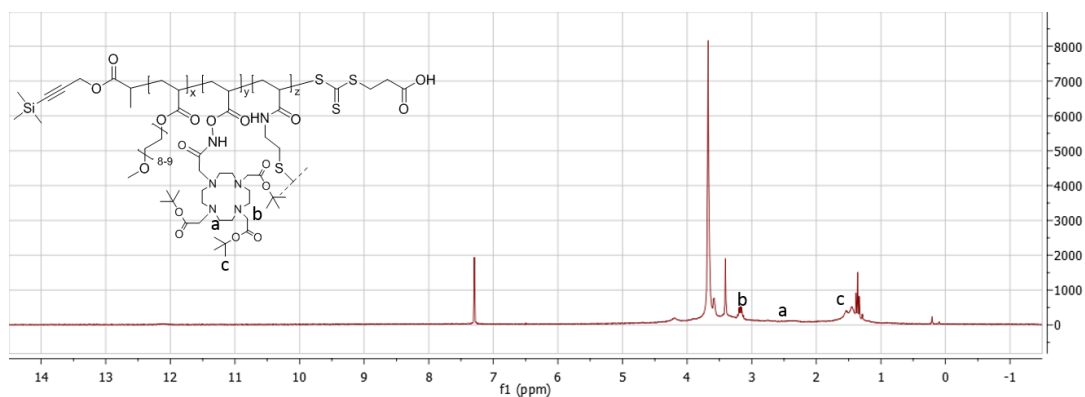

**Figure S21.**  $^1\text{H}$  NMR spectrum of CCS-C-DO3A recorded in  $\text{CDCl}_3$

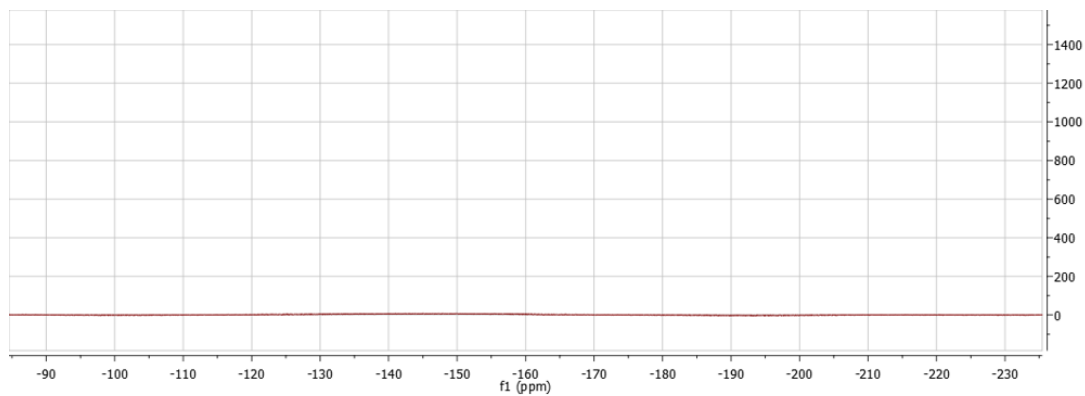

**Figure S22.**  $^{19}\text{F}$  NMR spectrum of CCS-C-DO3A recorded in  $\text{CDCl}_3$

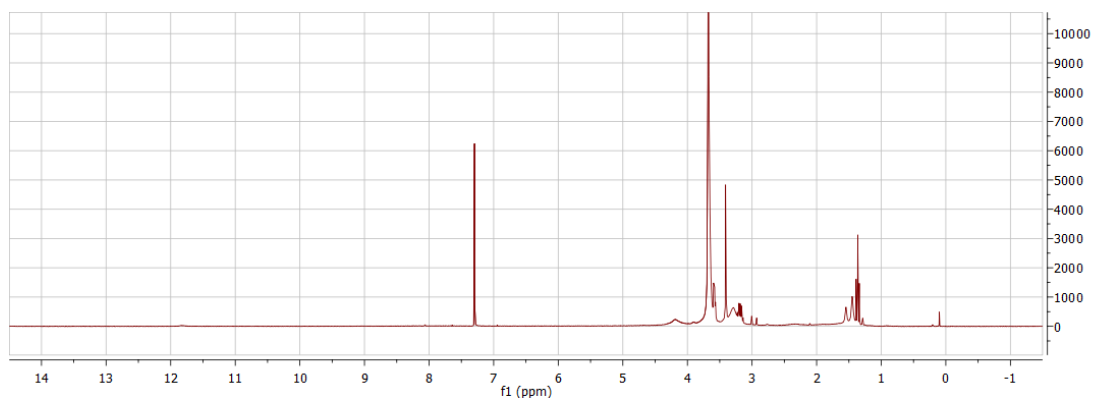

**Figure S23.**  $^1\text{H}$  NMR spectrum of HBP-D-DO3A recorded in  $\text{CDCl}_3$

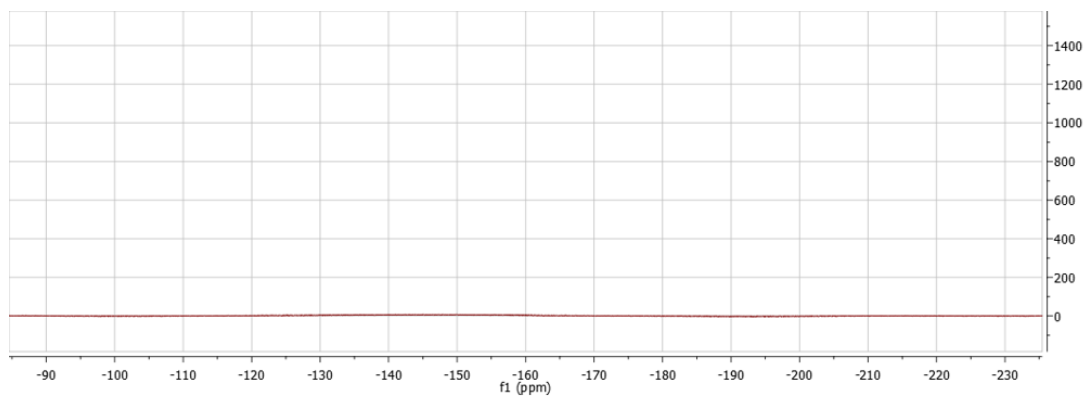

**Figure S24.**  $^{19}\text{F}$  NMR spectrum of HBP-D-DO3A recorded in  $\text{CDCl}_3$



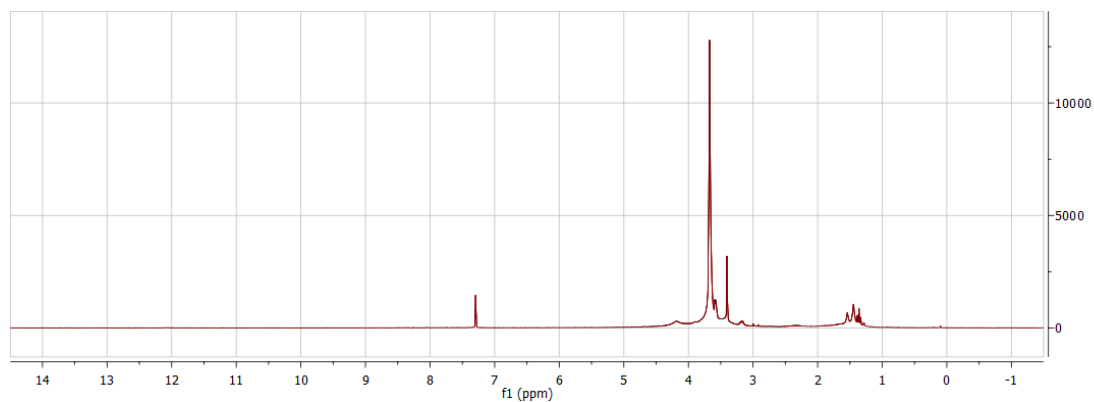

**Figure S25.**  $^1\text{H}$  NMR spectrum of HBP-E-DO3A recorded in  $\text{CDCl}_3$

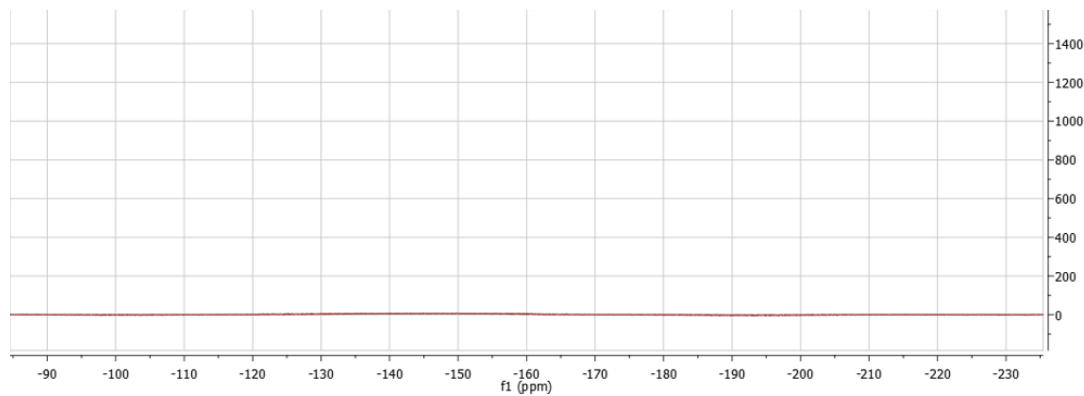

**Figure S26.**  $^{19}\text{F}$  NMR spectrum of HBP-E-DO3A recorded in  $\text{CDCl}_3$

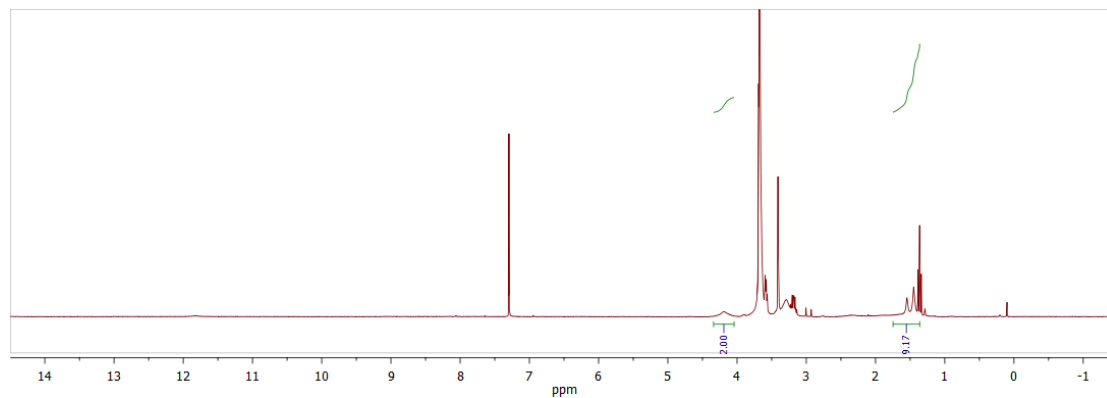

**Figure S27.**  $^1\text{H}$  NMR spectrum of HBP-D recorded in  $\text{CDCl}_3$

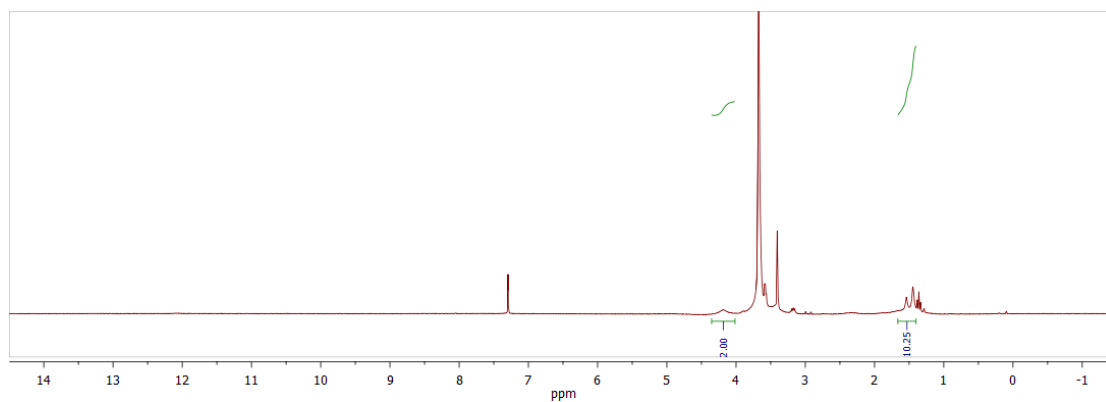

**Figure S28.**  $^1\text{H}$  NMR spectrum of HBP-E recorded in  $\text{CDCl}_3$

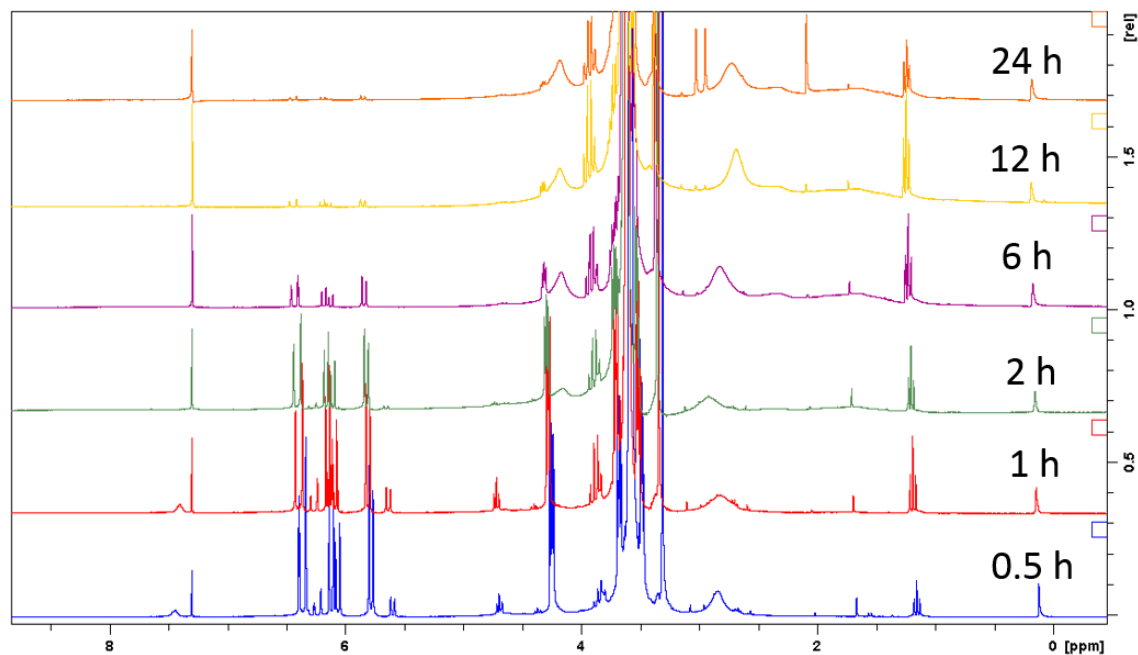

**Figure S29.**  $^1\text{H}$  NMR spectrum of the kinetic study of HBP-D. (Recorded in  $\text{CDCl}_3$ )

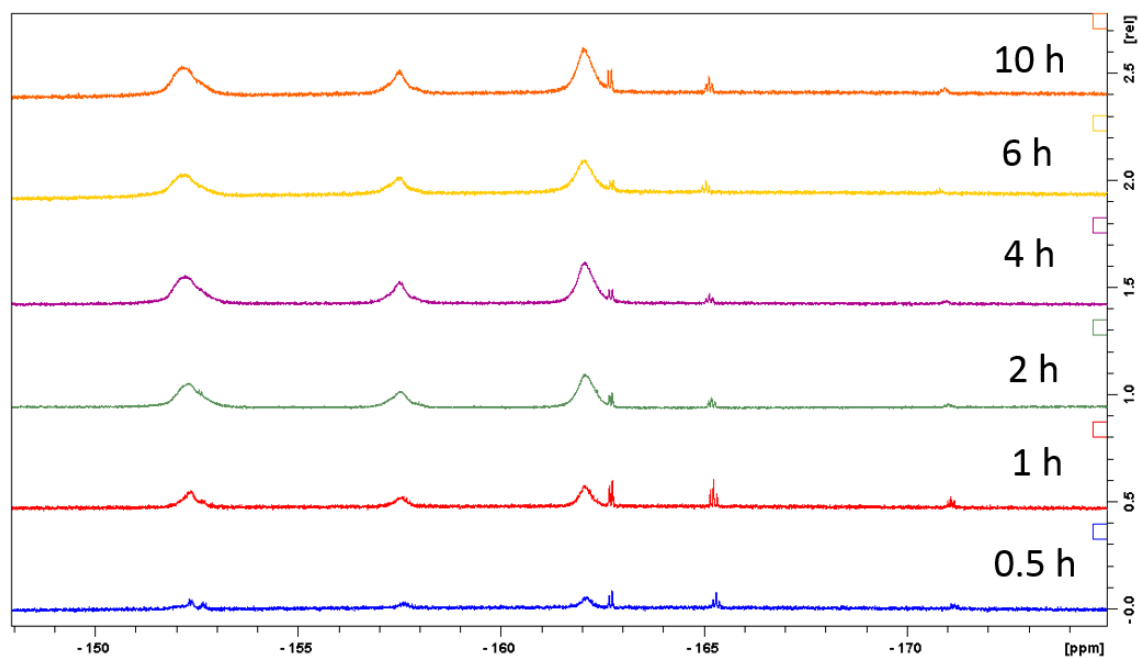

**Figure S30.**  $^{19}\text{F}$  NMR spectrum of the kinetic study of HBP-D. (Recorded in  $\text{CDCl}_3$ )

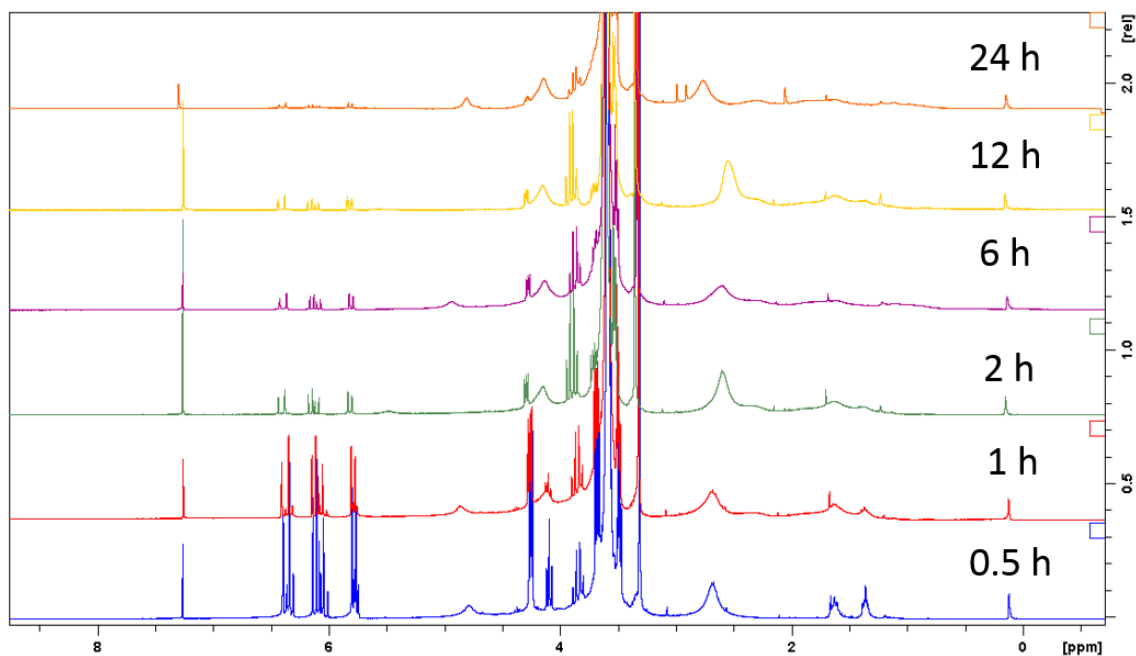

**Figure S31.**  $^1\text{H}$  NMR spectrum of the kinetic study of HBP-E. (Recorded in  $\text{CDCl}_3$ )

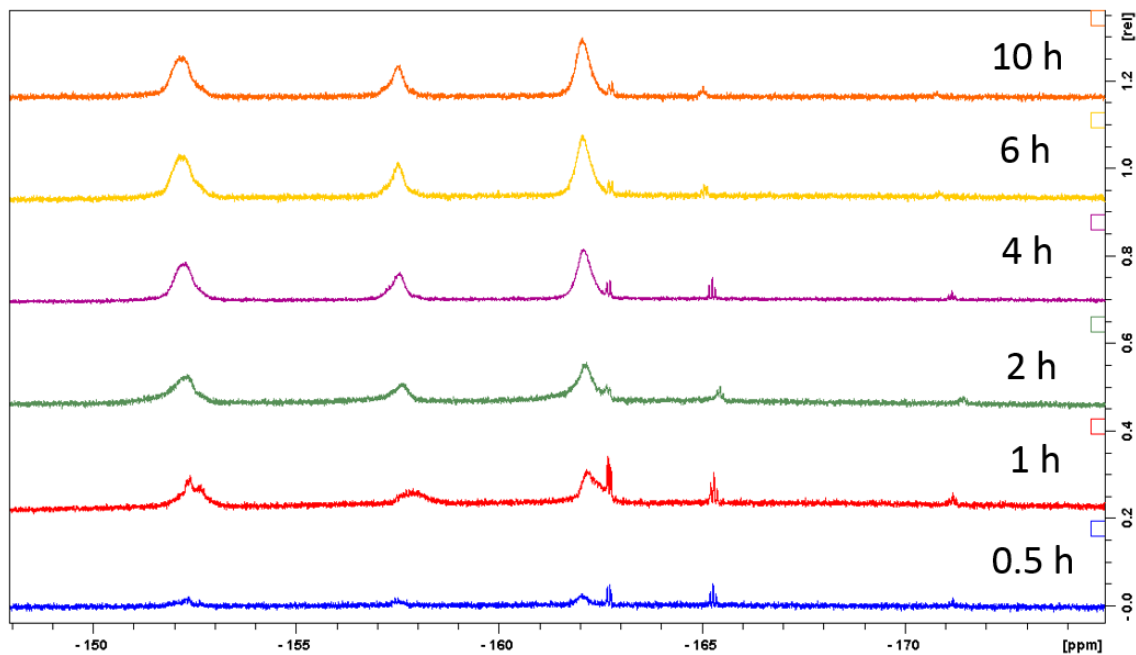

**Figure S32.**  $^{19}\text{F}$  NMR spectrum of the kinetic study of HBP-E. (Recorded in  $\text{CDCl}_3$ )

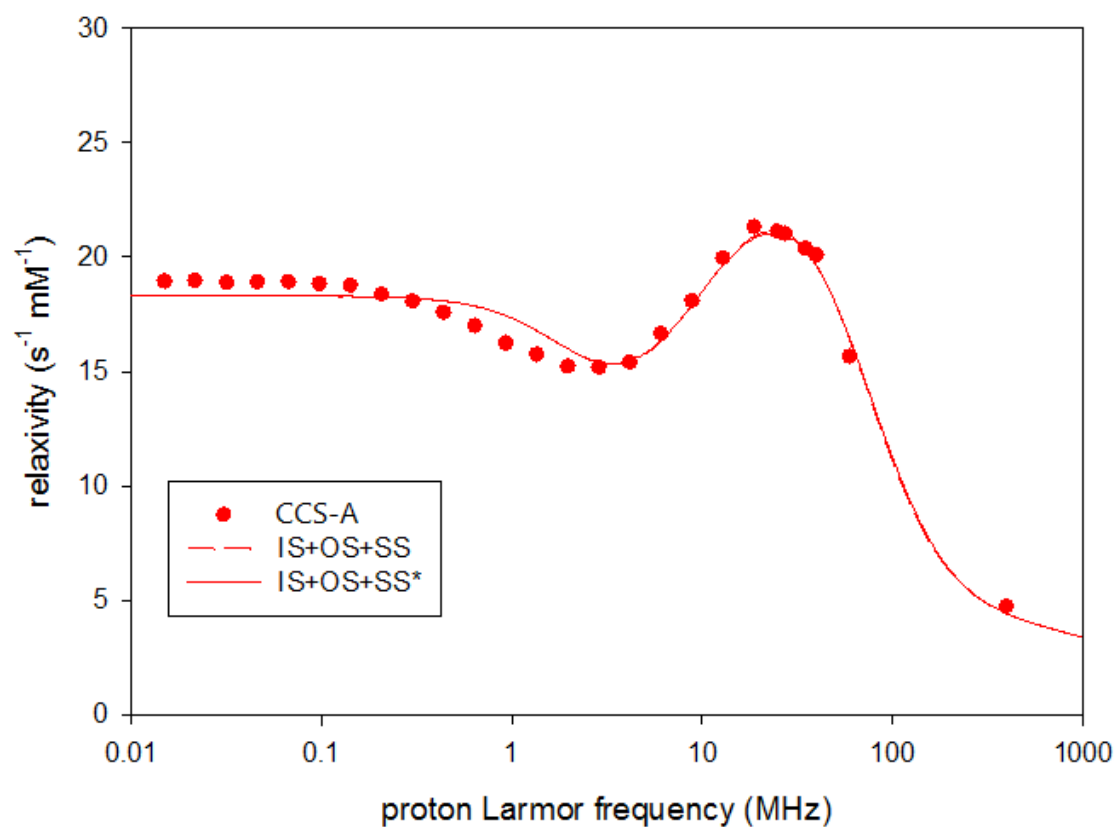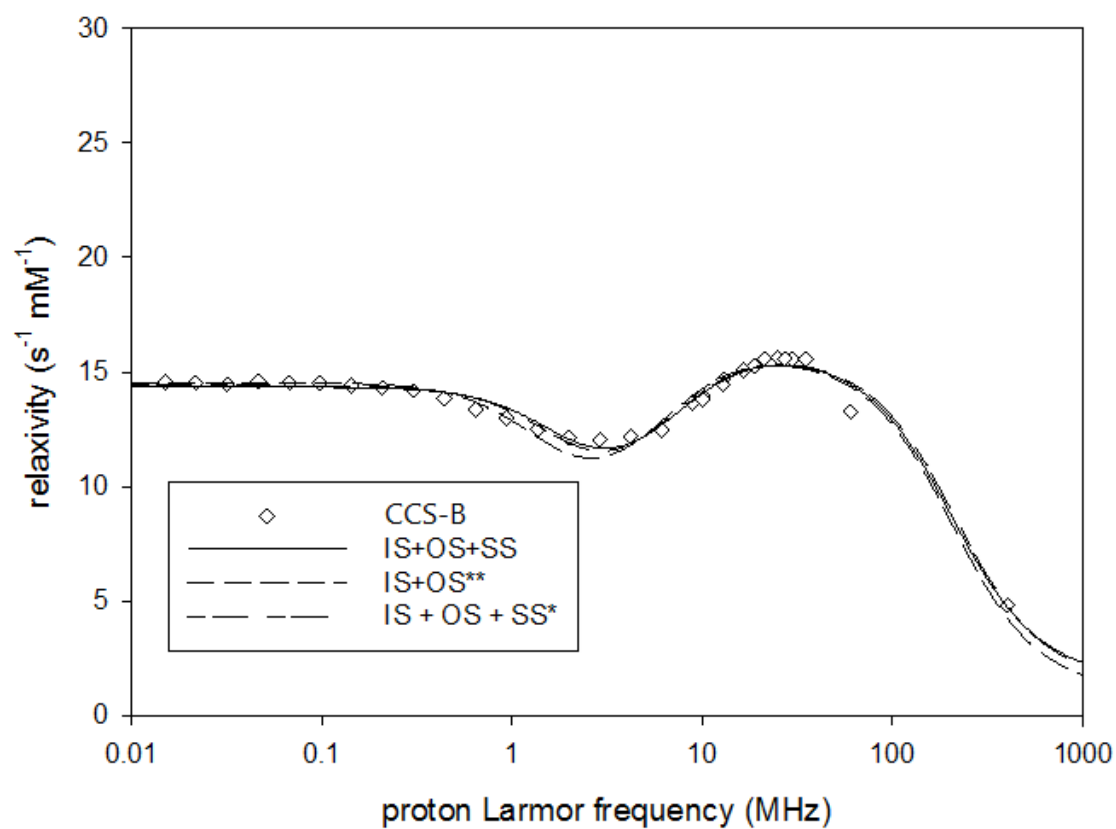

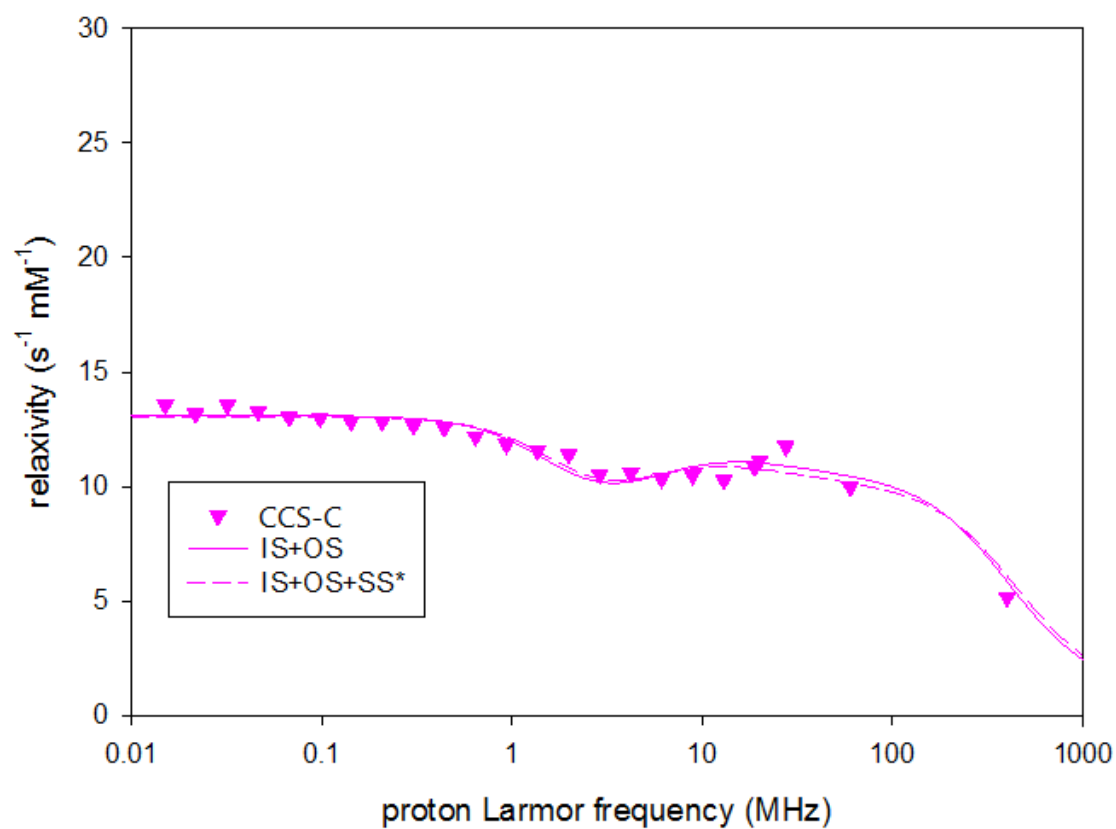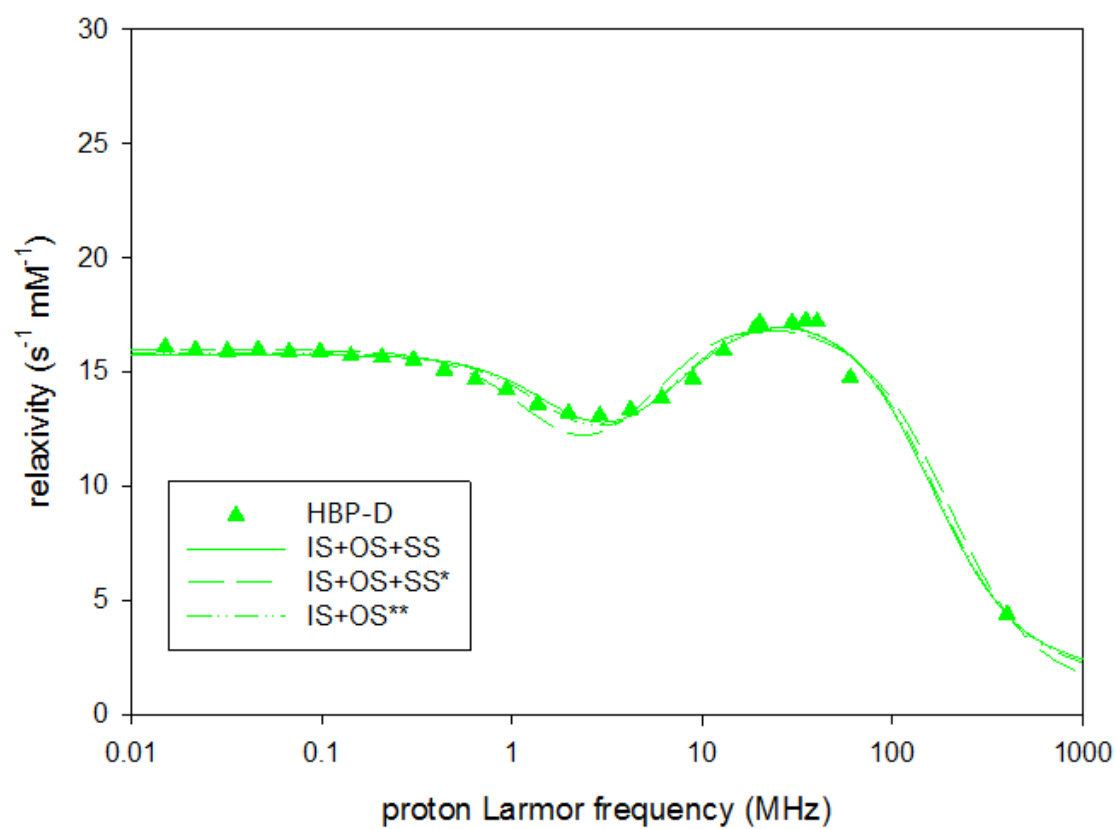

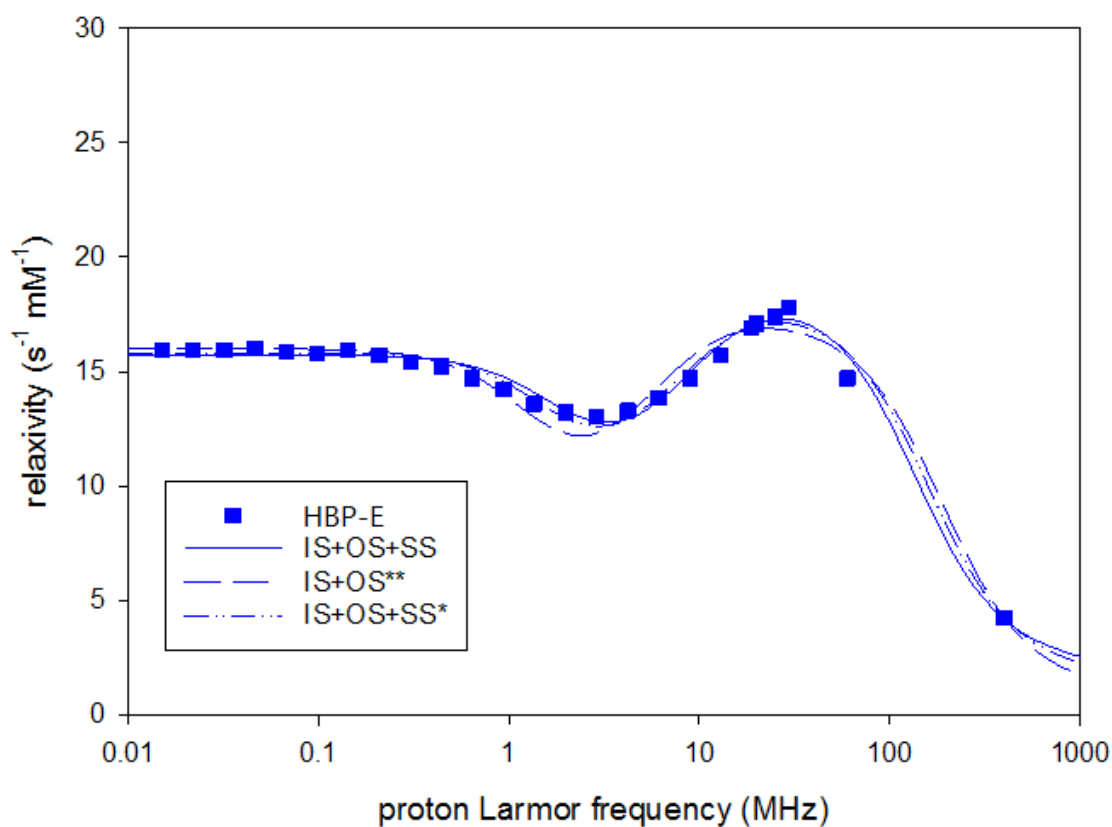

**Figure S33.** <sup>1</sup>H NMRD profiles of CCS-A, CCS-B, CCS-C, HBP-D and HBP-E. \*range of  $\tau_M$  fixed between 750 and 900 ns during the fitting (IS + OS + SS). \*\* range of  $\tau_M$  fixed between 750 and 900 ns during the fitting (IS + OS).

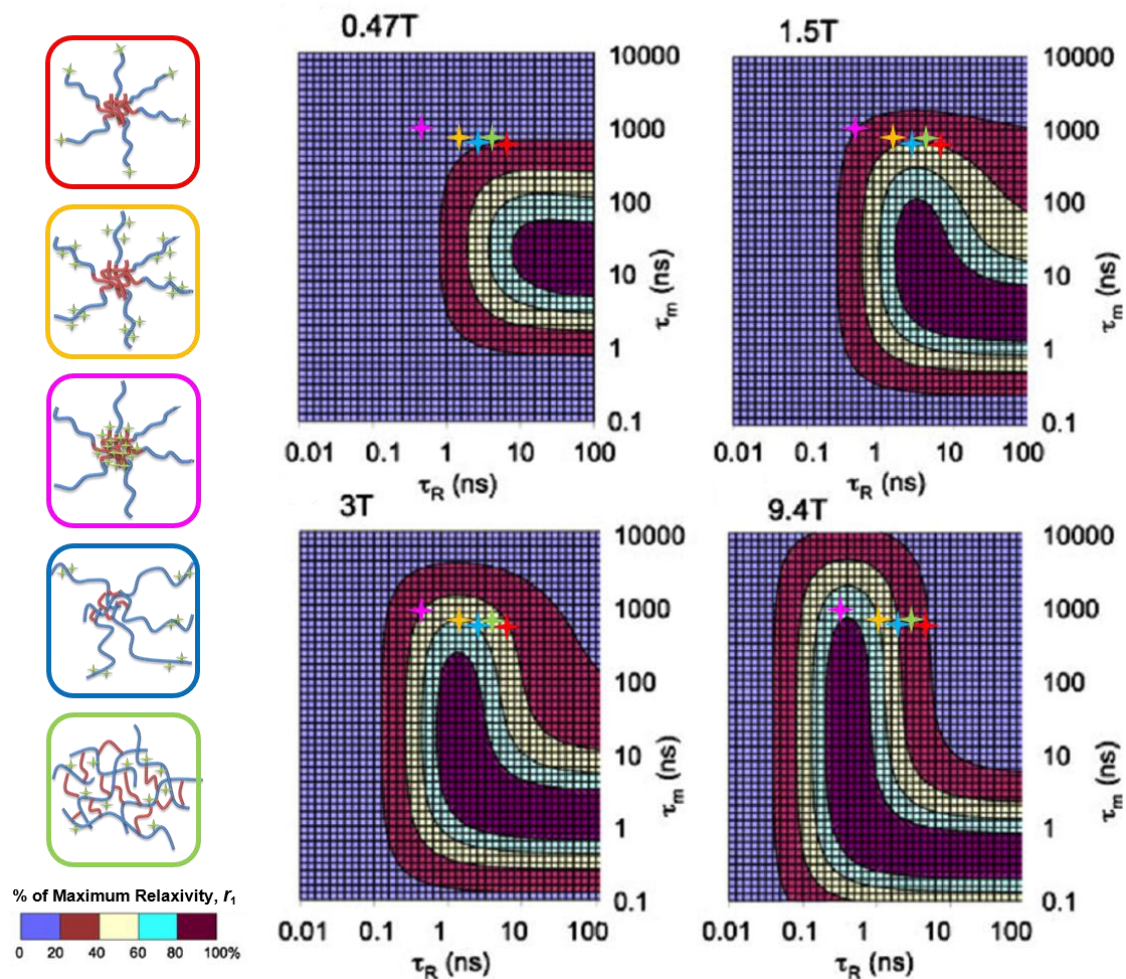

**Figure S34.** 2D simulation of interplay between water residency time ( $\tau_m$ ) and rotational motion ( $\tau_R$ ) on maximum achievable  $r_1$ .

## Part 2: Determination of Polymer Composition

The composition of OEGA and NHS ester moieties was calculated using  $^1\text{H}$  NMR according to the following equations:

$$f_{\text{OEGA}} = \int_{4.5\text{ppm}}^{4.1\text{ppm}} / 2 / (\int_{4.5\text{ppm}}^{4.1\text{ppm}} / 2 + \int_{2.95\text{ppm}}^{2.75\text{ppm}} / 4)$$

$$f_{\text{NHS}} = \int_{2.95\text{ppm}}^{2.75\text{ppm}} / 4 / (\int_{4.5\text{ppm}}^{4.1\text{ppm}} / 2 + \int_{2.95\text{ppm}}^{2.75\text{ppm}} / 4)$$

Where  $\int_{4.5\text{ppm}}^{4.1\text{ppm}}$  corresponds to the  $\text{CH}_2$  protons of OEGA and  $\int_{2.95\text{ppm}}^{2.75\text{ppm}}$  is the integral of the signal of  $\text{CH}_2\text{-CH}_2$  from the NHS ester.

The composition of OEGA and PFPA moieties was calculated using 2,2,2-Trifluoroethanol (TFE) as a reference in  $^1\text{H}$  NMR and  $^{19}\text{F}$  NMR according to the following equations:

In the  $^1\text{H}$  NMR:

$$f_{\text{TFE}} = \int_{4.06\text{ppm}}^{3.86\text{ppm}} / 2 / (\int_{4.06\text{ppm}}^{3.86\text{ppm}} / 2 + \int_{4.5\text{ppm}}^{4.1\text{ppm}} / 2)$$

$$f_{\text{OEGA}} = \int_{4.5\text{ppm}}^{4.1\text{ppm}} / 2 / (\int_{4.06\text{ppm}}^{3.86\text{ppm}} / 2 + \int_{4.5\text{ppm}}^{4.1\text{ppm}} / 2)$$

Where  $\int_{4.06\text{ppm}}^{3.86\text{ppm}}$  corresponds to the  $\text{CH}_2$  protons of TFE and  $\int_{4.5\text{ppm}}^{4.1\text{ppm}}$  is the integral of the signal of  $\text{CH}_2$  from the OEGA.

In the  $^{19}\text{F}$  NMR

$$f_{\text{TFE}} = \int_{-79.75\text{ppm}}^{-76.04\text{ppm}} / 3 / [\int_{-79.75\text{ppm}}^{-76.04\text{ppm}} / 3 + (\int_{-154.50\text{ppm}}^{-153.17\text{ppm}} + \int_{-160.94\text{ppm}}^{-159.01\text{ppm}} + \int_{-165.07\text{ppm}}^{-163.61\text{ppm}}) / 5]$$

$$f_{\text{PFPA}} = (\int_{-154.50\text{ppm}}^{-153.17\text{ppm}} + \int_{-160.94\text{ppm}}^{-159.01\text{ppm}} + \int_{-165.07\text{ppm}}^{-163.61\text{ppm}}) / 5 / [\int_{-79.75\text{ppm}}^{-76.04\text{ppm}} / 3 + (\int_{-154.50\text{ppm}}^{-153.17\text{ppm}} + \int_{-160.94\text{ppm}}^{-159.01\text{ppm}} + \int_{-165.07\text{ppm}}^{-163.61\text{ppm}}) / 5]$$

Where  $\int_{-79.75\text{ppm}}^{-76.04\text{ppm}}$  is the integrals from signals attributed to the  $^{19}\text{F}$  from TFE and  $(\int_{-154.50\text{ppm}}^{-153.17\text{ppm}} + \int_{-160.94\text{ppm}}^{-159.01\text{ppm}} + \int_{-165.07\text{ppm}}^{-163.61\text{ppm}})$  represent the  $^{19}\text{F}$  signal of PFPA.

If the  $f_{\text{TFE}}$  in the last two equations give the same value, the polymer composition will be the following equation:

$$f_{\text{OEGA}} = \int_{4.5\text{ppm}}^{4.1\text{ppm}} / 2 / [\int_{4.5\text{ppm}}^{4.1\text{ppm}} / 2 + (\int_{-154.50\text{ppm}}^{-153.17\text{ppm}} + \int_{-160.94\text{ppm}}^{-159.01\text{ppm}} + \int_{-165.07\text{ppm}}^{-163.61\text{ppm}}) / 5]$$

$$f_{\text{PFPA}} = (\int_{-154.50\text{ppm}}^{-153.17\text{ppm}} + \int_{-160.94\text{ppm}}^{-159.01\text{ppm}} + \int_{-165.07\text{ppm}}^{-163.61\text{ppm}}) / 5 / [\int_{4.5\text{ppm}}^{4.1\text{ppm}} / 2 + (\int_{-154.50\text{ppm}}^{-153.17\text{ppm}} + \int_{-160.94\text{ppm}}^{-159.01\text{ppm}} + \int_{-165.07\text{ppm}}^{-163.61\text{ppm}}) / 5]$$

The composition of OEGA and DO3A moieties was calculated using  $^1\text{H}$  NMR according to the following equations:

$$f_{\text{OEGA}} = \int_{4.5\text{ppm}}^{4.1\text{ppm}} / 2 / (\int_{4.5\text{ppm}}^{4.1\text{ppm}} / 2 + \int_{1.7\text{ppm}}^{1.4\text{ppm}} / 27)$$

$$f_{\text{DO3A}} = \int_{1.7\text{ppm}}^{1.4\text{ppm}} / 27 / (\int_{4.5\text{ppm}}^{4.1\text{ppm}} / 2 + \int_{1.7\text{ppm}}^{1.4\text{ppm}} / 27)$$



Where  $\int_{4.5ppm}^{4.1ppm}$  corresponds to the CH<sub>2</sub> protons of OEGA and  $\int_{1.7ppm}^{1.4ppm}$  is the integral of the signal of CH<sub>3</sub> from the *tert*-butyl group of DO3A.

### ***Part 3: Determination of monomer conversion***

Monomer conversions ( $\alpha$ ) are calculated as followed:

In the equation, subscript “0” and “t” corresponding to time 0 and different reaction times (0.5-24 hours), respectively.

$$\alpha_{\text{OEGA}} = 1 - \frac{(F_{\text{OEGA}})_t / (F_{\text{TMS}})_t}{(F_{\text{OEGA}})_0 / (F_{\text{TMS}})_0}$$

$$\alpha_{N,N'\text{-methylenebisacrylamide}} = 1 - \frac{(F_{N,N'\text{-methylenebisacrylamide}})_t / (F_{\text{TMS}})_t}{(F_{N,N'\text{-methylenebisacrylamide}})_0 / (F_{\text{TMS}})_0}$$

$$\alpha_{1,6\text{-hexanediol diacrylate}} = 1 - \frac{(F_{1,6\text{-hexanediol diacrylate}})_t / (F_{\text{TMS}})_t}{(F_{1,6\text{-hexanediol diacrylate}})_0 / (F_{\text{TMS}})_0}$$

$$\alpha_{\text{PFPA}} = \frac{(F_{\text{PFPA}})_t}{(F_{\text{PFPA}})_n + (F_{\text{PFPA Monomer}})_t}$$

Using <sup>1</sup>H NMR, f<sub>TMS</sub>, f<sub>OEGA</sub>, f<sub>N,N'-methylenebisacrylamide</sub> and f<sub>1,6-hexanediol diacrylate</sub> are defined:

$$f_{\text{TMS}} = \int_{0.5ppm}^{0ppm} / 9$$

$$f_{\text{OEGA}} = \int_{5.8ppm}^{5.7ppm}$$

$$f_{N,N'\text{-methylenebisacrylamide}} = \int_{5.6ppm}^{5.5ppm}$$

$$f_{1,6\text{-hexanediol diacrylate}} = \int_{6.4ppm}^{6.3ppm}$$

Using <sup>19</sup>F NMR, f<sub>PFPA</sub> and f<sub>PFPA Monomer</sub> are defined:

$$f_{\text{PFPA}} = \left( \int_{-154.50ppm}^{-153.17ppm} + \int_{-160.94ppm}^{-159.01ppm} + \int_{-165.07ppm}^{-163.61ppm} \right)$$

$$f_{\text{PFPA Monomer}} = \left( \int_{-163.0ppm}^{-162.5ppm} + \int_{-165.5ppm}^{-165.0ppm} + \int_{-171.5ppm}^{-171.0ppm} \right)$$
